# Supplementary material for: A non-dividing cell population with high pyruvate dehydrogenase kinase activity regulates metabolic heterogeneity and tumorigenesis in the intestine
Source: PubMed Central journal article supplement (PMC8938512; doi:10.1038/s41467-022-29085-y), 2022-03-21
Supplement: 41467_2022_29085_MOESM3_ESM.pdf [file 41467_2022_29085_MOESM3_ESM.pdf]

## **Description of Additional Supplementary Files**

**File Name:** Supplementary Data 1

**Description:** list of glycolytic and antioxidant genes gene-sets manually curated

**File Name:** Supplementary Data 2

**Description:** list of primer sequences used in this study
